# Supplementary material
Source: PubMed Central journal article supplement (PMC6389441)
Supplement: NIHMS1518373-supplement-1.pdf [file NIHMS1518373-supplement-1.pdf]

## **Self-Generated Unconscious Processing of Loss Linked to Less Severe Grieving**

### ***Supplemental Information***

#### **MRI**

Blood-oxygen-level dependent (BOLD) images were acquired on a GE 3-T scanner parallel to the anterior commissure-posterior commissure (AC-PC) line with a T2\*-weighted EPI sequence of 45 contiguous slices (TR=2000ms, TE=25ms, flip angle = 77, FoV=192 x 192mm) of 3mm thickness and 3x3 in-plane resolution. Structural images were acquired with a T1-weighted SPGR sequence recording 256 slices at a slice thickness of 1mm and in-plane resolution of 1x1mm.

Preprocessing was carried out using FSL version 6 (FMRIB's Software Library, [www.fmrib.ox.ac.uk/fsl](http://www.fmrib.ox.ac.uk/fsl)) (1). Preprocessing included slice time correction, motion correction, skull stripping and smoothing with a Gaussian kernel of 6mm FWHM. A 120-second high pass filter was applied to the data. All data were corrected for head motion by removing the influence of six motion time courses. Bias field correction was implemented using FSL-FAST for functional and structural images (2). Following preprocessing functional images were registered to structural images with 7-degrees of freedom and then structural images were warped to the standard MNI space using a 12-degree affine registration followed by a non-linear warp implemented in FNIRT (3, 4). Following the acquisition of the first 23 subjects, the T1 bias corrections step failed necessitating the removal of this step from preprocessing for subsequent subjects. To reduce the effect of this noise on the overall model, these subjects were excluded from the pattern-training phase (i.e. Stroop task) and only incorporated in the pattern application phase (SART-PROBES). The primary analysis was run with and without these subjects and effects were unchanged (see Results). All images were registered to the MNI standard space template. All regional delineations are defined according to the Harvard-Oxford atlases.

**MVPA analysis**

The prediction of RT was implemented through a multivariate linear regression. For each subject, we first computed the z score of RT and the z score of the BOLD activity at each voxel within the feature mask across all deceased-related trials. Then we concatenated RT and BOLD activity across all subjects and constructed a linear regression model implemented using FaSTGLZ (5) to predict RT to deceased-related words using the BOLD activity across voxels in the d-SA voxel mask. A 10x10 fold cross validation procedure was used to optimize the neural pattern for d-SA (i.e.  $W$ ). That is, the blocks were randomly split into 10 parts (folds), where nine folds were used to train the models, and the tenth fold was used to measure the out-of-sample prediction.

To test the significance of the prediction, we used a permutation procedure where we randomly permuted the RT and calculated the mean squared error (MSE) of the prediction. This procedure was repeated for 1000 times to obtain an empirical null distribution of the MSE. The significance of the prediction was then determined by comparing the observed MSE against the empirical null distribution.

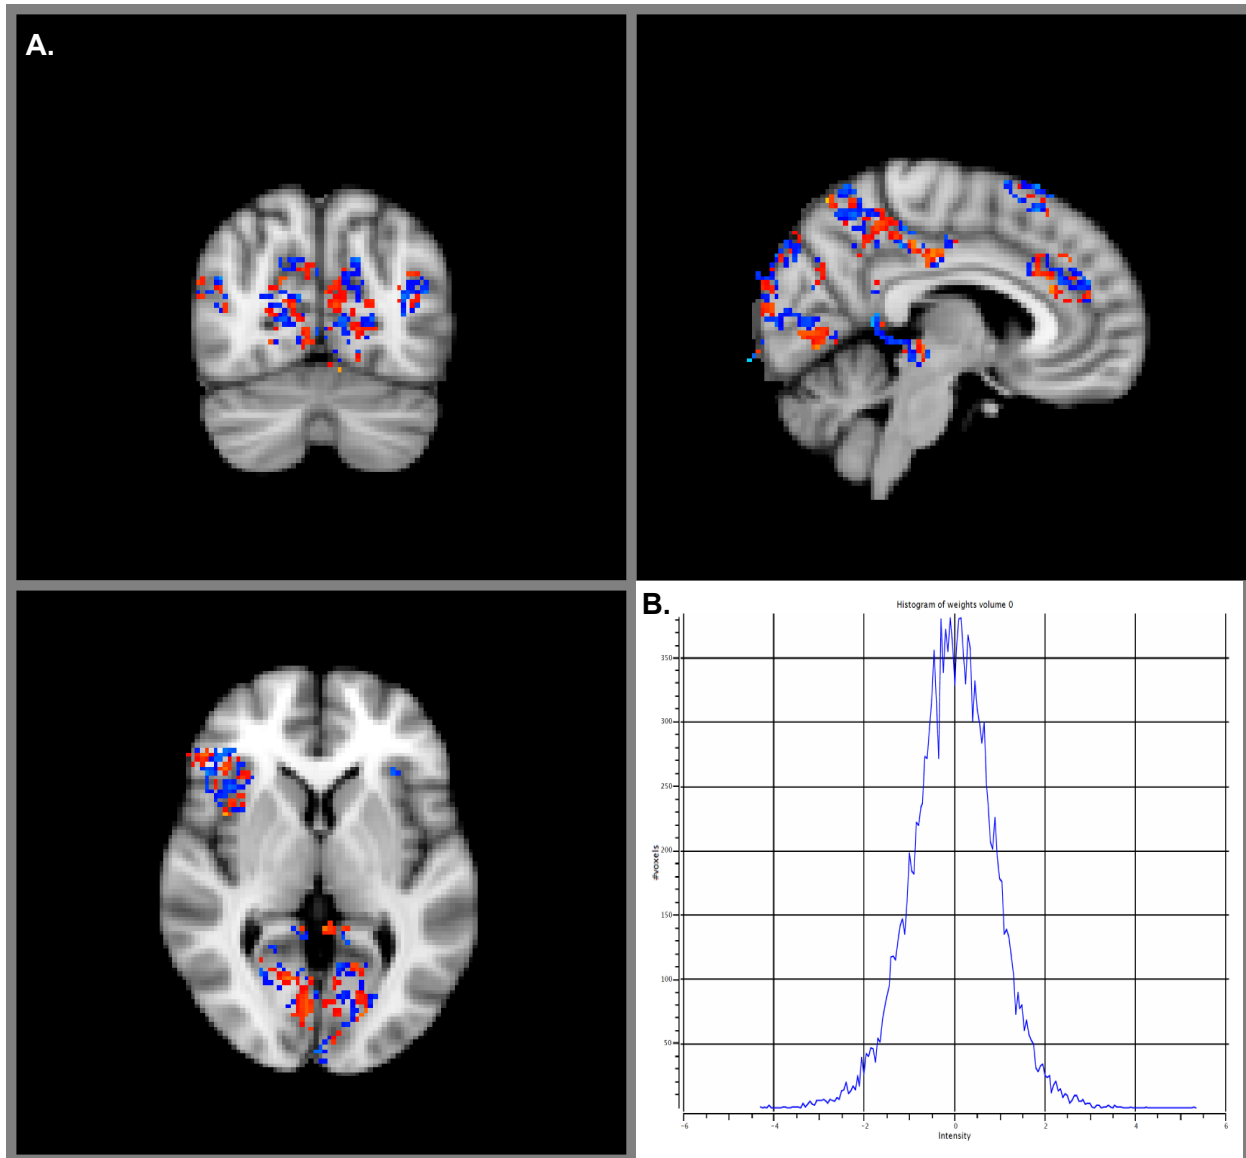

**Figure S1. d-SA Weighting Matrix.** A 3D weighting matrix was identified by the machine learning regression. This weighting matrix optimized the prediction of longer Stroop RTs on the basis of trial by trial BOLD data. Because it predicted longer Stroop RTs this matrix was interpreted as a neural pattern corresponding to the engagement of decreased-related selective attention (i.e. d-SA), which when applied in the Stroop task would lengthen RTs. Blue indicates negative weighting and red indicates positive weighting. **B.** Histogram of weighting values across the 3D d-SA matrix.

**Table S1. Regional Distribution of d-SA Weighting Matrix**

|                                     | Cluster Center (XYZ) |       |       | Voxel # | Average Weight |
|-------------------------------------|----------------------|-------|-------|---------|----------------|
| Brain Stem                          | 43.46                | 47.72 | 30.39 | 158     | 0.15           |
| Central Opercular Cortex            | 24.74                | 67.63 | 38.74 | 19      | -0.22          |
| Cingulate Gyrus, anterior division  | 44.58                | 76.14 | 48.54 | 440     | 0.08           |
| Cingulate Gyrus, posterior division | 45.11                | 43.92 | 48.63 | 546     | -0.11          |
| Cuneal Cortex                       | 45.48                | 23.15 | 50.15 | 845     | 0.00           |
| Frontal Operculum Cortex            | 24.00                | 72.66 | 37.04 | 187     | 0.11           |
| Frontal Orbital Cortex              | 43.37                | 73.73 | 29.18 | 1017    | 0.00           |
| Frontal Pole                        | 30.22                | 85.63 | 50.15 | 474     | -0.01          |
| Inferior Frontal Gyrus opercularis  | 19.90                | 72.80 | 38.40 | 10      | 0.13           |
| Inferior Frontal Gyrus triangularis | 19.54                | 77.25 | 37.83 | 313     | -0.07          |
| Insular Cortex                      | 32.31                | 69.87 | 34.02 | 450     | 0.03           |
| Intracalcarine Cortex               | 44.83                | 26.16 | 40.21 | 1078    | 0.03           |
| Lateral Occipital Cortex-inferior   | 41.67                | 27.08 | 42.13 | 86      | -0.15          |
| Lateral Occipital Cortex-superior   | 46.82                | 22.63 | 50.20 | 2279    | -0.01          |
| Left Hippocampus                    | 56.92                | 49.67 | 29.38 | 24      | -0.34          |
| Lingual Gyrus                       | 45.61                | 31.36 | 33.60 | 1247    | 0.00           |
| Middle Frontal Gyrus                | 31.47                | 76.63 | 53.34 | 122     | -0.16          |
| Middle Temporal Gyrus-anterior      | 21.46                | 63.38 | 22.77 | 13      | 0.20           |
| Middle Temporal Gyrus-posterior     | 19.11                | 53.76 | 28.85 | 112     | -0.02          |
| Occipital Fusiform Gyrus            | 50.72                | 22.52 | 27.84 | 90      | -0.37          |
| Occipital Pole                      | 46.26                | 16.54 | 47.23 | 1446    | 0.04           |
| Paracingulate Gyrus                 | 44.03                | 80.84 | 49.78 | 585     | 0.03           |
| Parahippocampal Gyrus               | 50.81                | 46.42 | 29.16 | 227     | 0.12           |
| Planum Polare                       | 24.43                | 60.59 | 27.48 | 54      | -0.28          |
| Postcentral Gyrus                   | 53.31                | 41.80 | 61.38 | 81      | -0.28          |
| Precuneous Cortex                   | 45.34                | 34.89 | 58.11 | 1985    | -0.01          |
| Right Thalamus                      | 38.09                | 51.32 | 33.36 | 22      | -0.11          |
| Subcallosal Cortex                  | 47.45                | 72.78 | 29.40 | 137     | -0.09          |
| Superior Frontal Gyrus              | 38.11                | 72.13 | 65.46 | 641     | 0.05           |
| Superior Parietal Lobule            | 52.81                | 36.92 | 65.15 | 26      | -0.04          |
| Superior Temporal Gyrus-anterior    | 21.64                | 63.64 | 24.64 | 11      | 0.02           |
| Superior Temporal Gyrus-posterior   | 20.44                | 53.62 | 32.15 | 39      | 0.33           |
| Supracalcarine Cortex               | 42.75                | 29.20 | 43.55 | 176     | 0.13           |
| Temporal Fusiform Cortex            | 53.84                | 45.33 | 22.84 | 69      | 0.20           |
| Temporal Occipital Fusiform Cortex  | 49.58                | 37.13 | 28.96 | 262     | -0.08          |
| Temporal Pole                       | 53.31                | 70.55 | 21.70 | 308     | 0.10           |

**Table S2. Prediction of ICG Score from d-SA Expression with Covariates**

|                        | B      | T     | <i>p</i> | 95% CI          | <i>Partial Corr</i> |
|------------------------|--------|-------|----------|-----------------|---------------------|
| Months Since Loss      | .83    | 1.42  | .17      | -0.38 to 2.05   | 0.31                |
| Psychiatric Medication | 3.53   | .84   | .41      | -5.23 to 12.30  | 0.19                |
| # MDD episodes         | -.77   | -.47  | .64      | -4.20 to 2.65   | -0.11               |
| Income                 | -.65   | -.41  | .68      | -3.95 to 2.66   | -0.09               |
| d-SA Expression        | -30.79 | -2.46 | .02      | -56.95 to -4.62 | -0.49               |

d-SA pattern expression during non-intrusion blocks predicts Inventory for Complicated Grief (ICG) score while controlling for demographic correlates of ICG.

**Table S3. Prediction of ICG Score from d-SA Expression Controlling for Loss Type**

|                 | B      | T     | <i>p</i> | 95% CI           | <i>Partial Corr</i> |
|-----------------|--------|-------|----------|------------------|---------------------|
| d-SA Expression | -29.68 | -4.29 | <.00     | -44.02 to -15.34 | -.67                |
| Loss Type       | 12.56  | 3.91  | <.00     | 5.89 to 19.24    | .64                 |

d-SA pattern expression during non-intrusion blocks predicts Inventory for Complicated Grief (ICG) score while controlling for type of loss (i.e. suicide vs non-suicide).

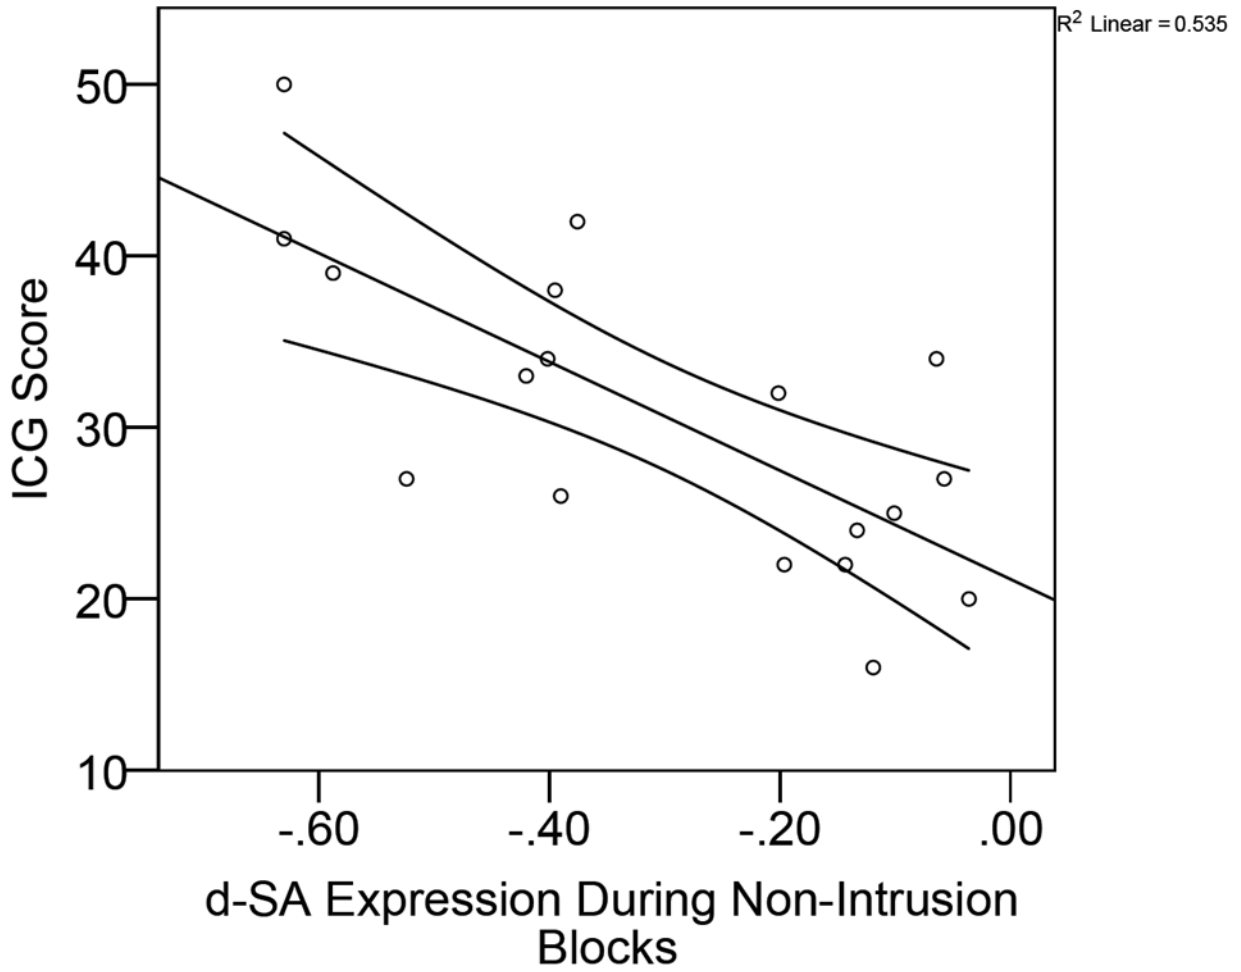

**Figure S2. Grief Severity by d-SA Expression in Suicide Bereaved Only**

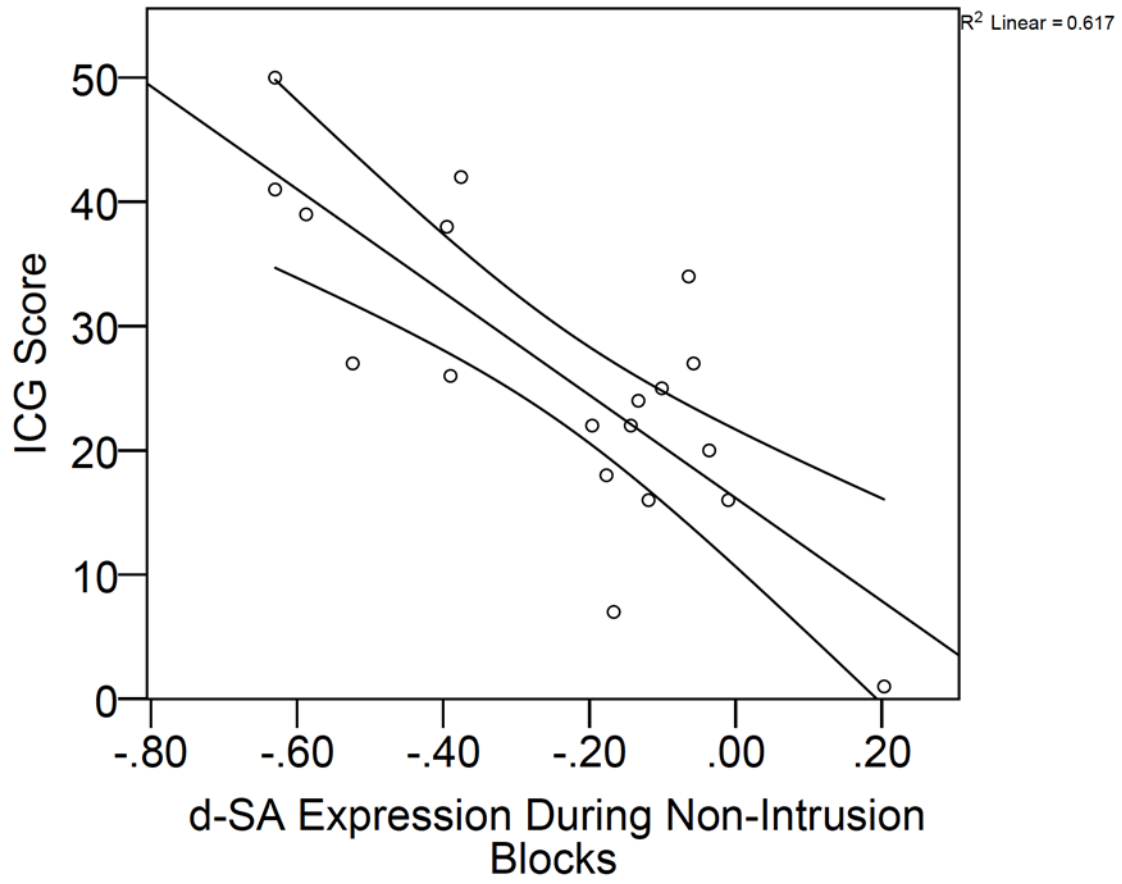

**Figure S3. Grief Severity by d-SA Expression in Original 23 Subjects**

## Supplemental References

1. Woolrich MW, Jbabdi S, Patenaude B, Chappell M, Makni S, Behrens T, et al. (2009): Bayesian analysis of neuroimaging data in FSL. *Neuroimage*. 45:S173-186.
2. Zhang Y, Brady M, Smith S (2001): Segmentation of brain MR images through a hidden Markov random field model and the expectation-maximization algorithm. *IEEE transactions on medical imaging*. 20:45-57.
3. Jenkinson M, Bannister P, Brady M, Smith S (2002): Improved optimization for the robust and accurate linear registration and motion correction of brain images. *Neuroimage*. 17:825-841.
4. J.L.R. Andersson MJaSMS (2007): Non-linear registration, aka Spatial normalisation. *FMRIB technical report TR07JA2*.
5. Conroy BR, Walz JM, Sajda P (2013): Fast bootstrapping and permutation testing for assessing reproducibility and interpretability of multivariate fMRI decoding models. *PLoS one*. 8:e79271.
